# Supplementary material for: Analysis of EF-Hand Proteins in Soybean Genome Suggests Their Potential Roles in Environmental and Nutritional Stress Signaling
Source: Front Plant Sci. 2017 May 24;8:877. doi: 10.3389/fpls.2017.00877 (PMC5443154; doi:10.3389/fpls.2017.00877)
Supplement: Supplementary file 2 [file Data_Sheet_1.DOCX]

Supplemental Figure S1. Effect of Ca2+ on the electrophoretic mobility of a non-Ca2+-binding protein IPD3. Purified recombinant IPD3 (segment of 68-265 aa) (0.5µg) was separated on SDS-PAGE gels supplemented with 1.0 mM CaCl2, 1.0 mM EGTA or 1.0 mM MgCl2, respectively and stained with Coomassie Brilliant Blue. The red arrow indicates the position of IPD3 segment. The positions of the molecular weight markers (kDa) are indicated on the left.
